# Supplementary material for: Impacts of Different Exposure Scenarios on Transcript Abundances in Danio rerio Embryos when Investigating the Toxicological Burden of Riverine Sediments
Source: PubMed Central journal article supplement (PMC4154683; doi:10.1371/journal.pone.0106523), 2014-09-04
Supplement: pone.0106523.s001.pdf [file pone.0106523.s001.pdf]

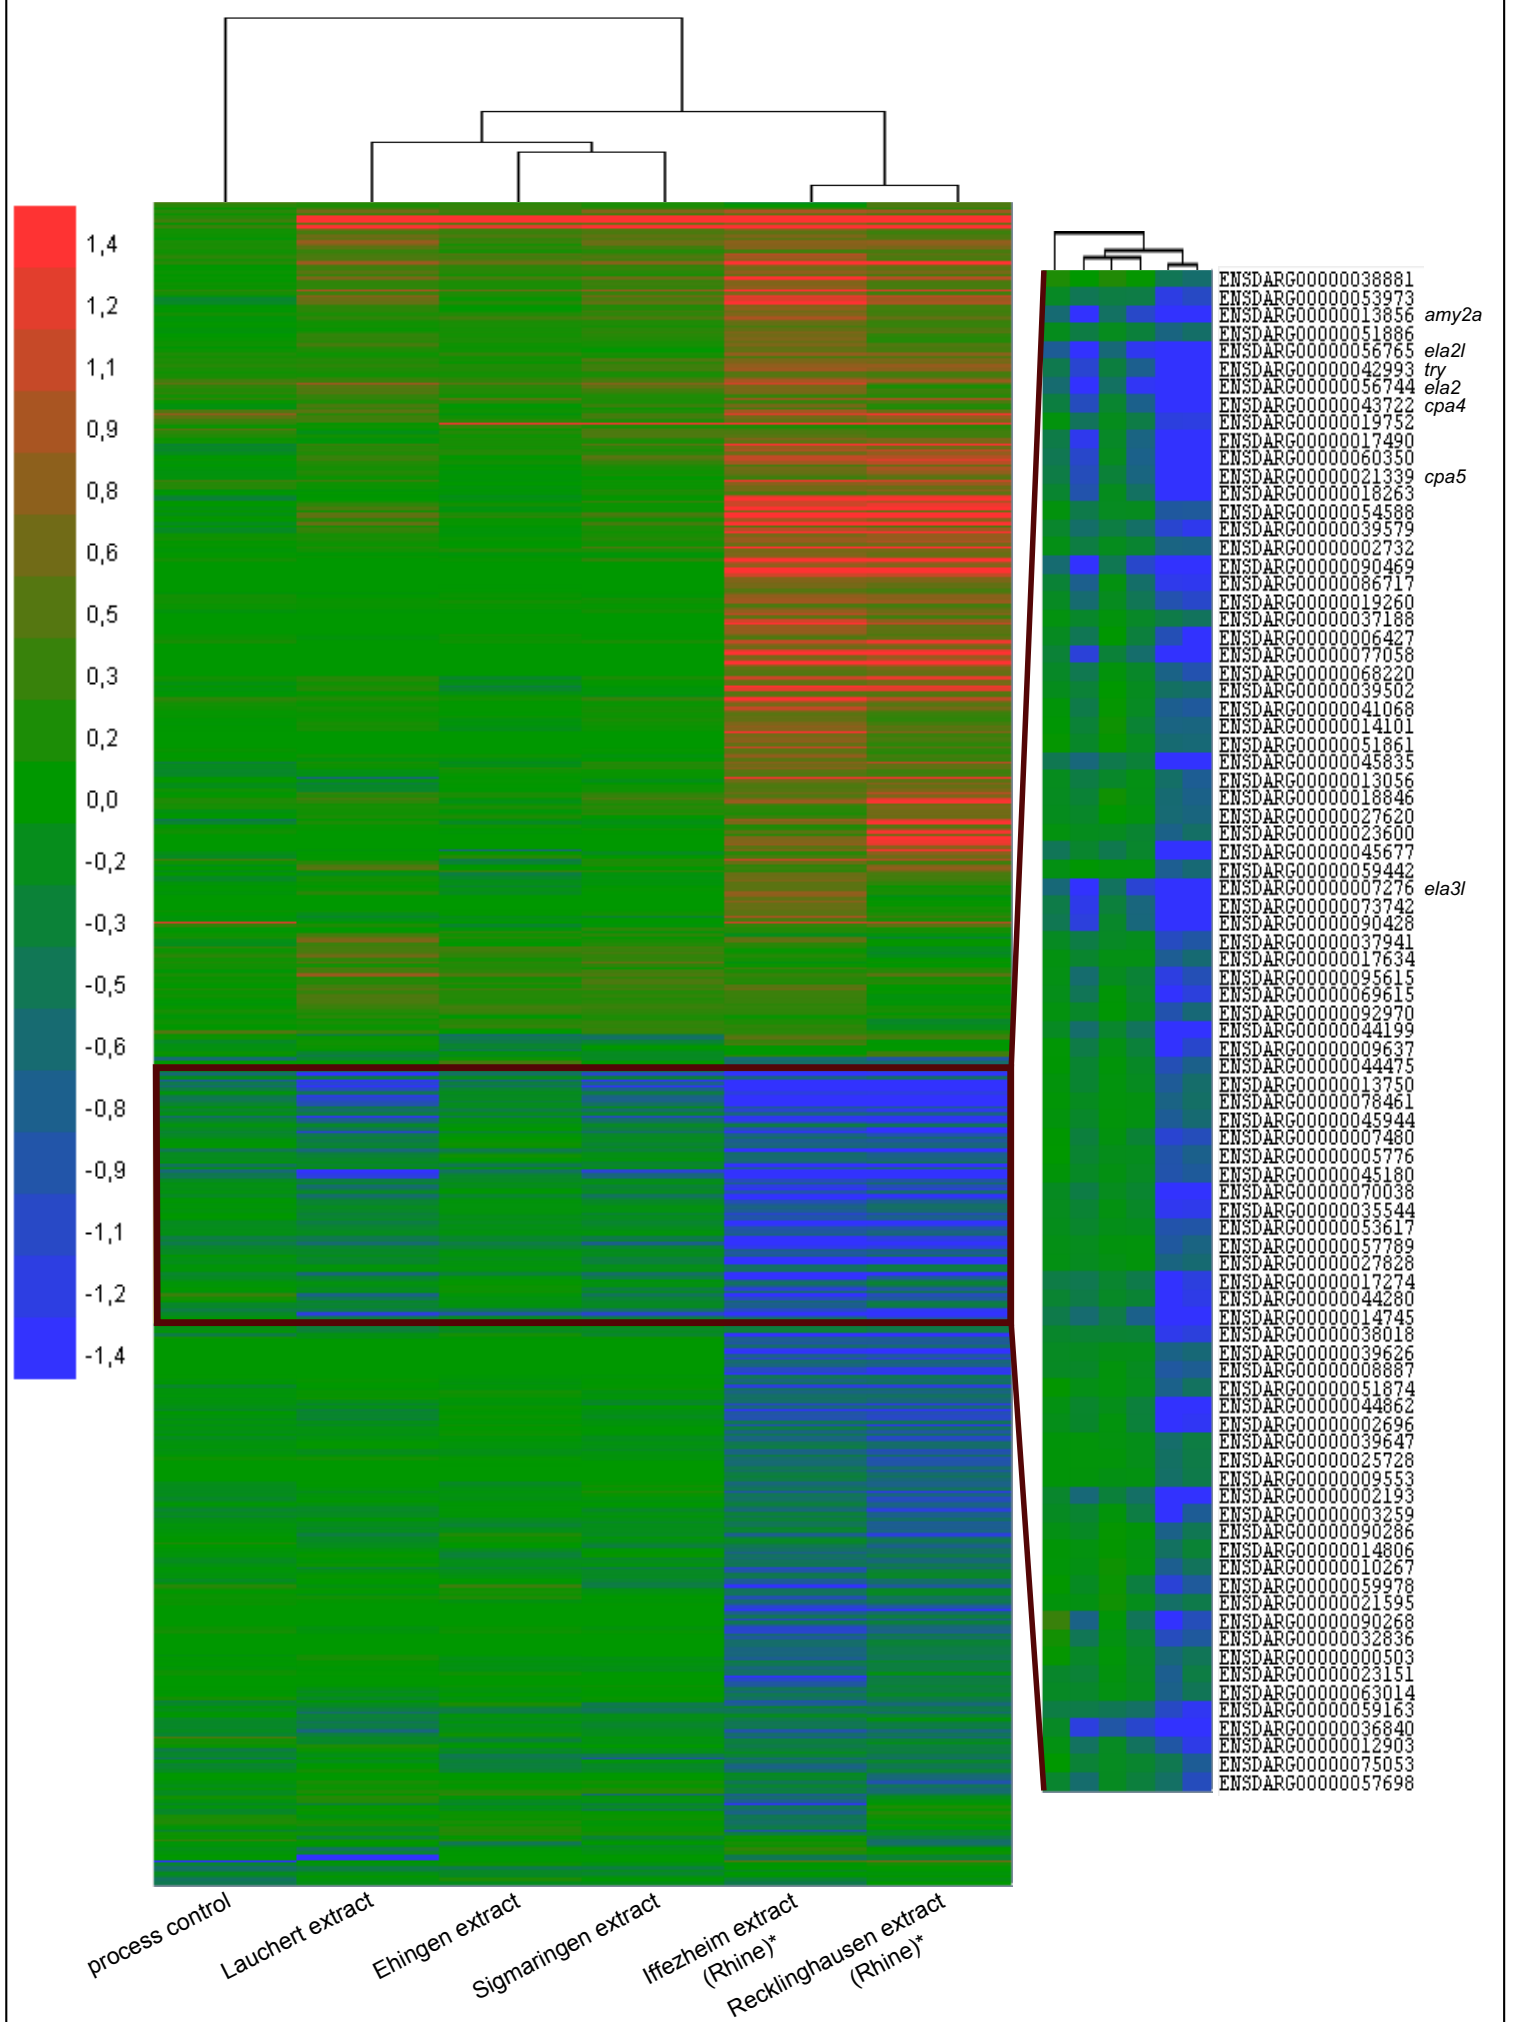

**Figure S1. Profiles of gene expression levels of extracts from Danube River sediments compared to sediment extracts from the river Rhine.** The profile of a process control is also presented. The highlighted set of genes includes down-regulated genes encoding proteins associated with digestion or fatty acid metabolism and hydrolase activity. Several of these genes were similarly regulated after treatment with extracts regardless of the sampling location.

\* Data according to Kosmehl et al. [9] (reanalysed)
