# Supplementary material for: Impacts of Different Exposure Scenarios on Transcript Abundances in Danio rerio Embryos when Investigating the Toxicological Burden of Riverine Sediments
Source: PubMed Central journal article supplement (PMC4154683; doi:10.1371/journal.pone.0106523), 2014-09-04
Supplement: pone.0106523.s002.pdf [file pone.0106523.s002.pdf]

**Table S1** Significant alterations in the expression level of mRNAs with a fold-change  $\geq 2$  and an adjusted p-value  $\leq 0.025$  for whole sediment and sediment extract treatments. Fold changes are listed for the corresponding gene names. A (green background) marks genes encoding proteins mainly with hydrolase activity. B (purple background) marks genes encoding enzymes related to xenobiotic metabolism. C (red background) marks genes encoding proteins related to DNA damage response or to DNA/mRNA binding. Investigated were whole sediments and sediment extracts from the sampling sites Sigmaringen (Sig), Ehingen (Ehi) as well as the tributary Lauchert (Lau) along the Danube River in Germany.

| Name or orthologous (ensembl genname)                        | GenBank ID | Sediment         |              |                  |             | Extract      |              |                   | Process control   |
|--------------------------------------------------------------|------------|------------------|--------------|------------------|-------------|--------------|--------------|-------------------|-------------------|
|                                                              |            | Lau sediment     | Sig sediment | Ehi sediment     | Silica dust | Lau extract  | Sig extract  | Ehi extract       |                   |
|                                                              |            | 300 mg/ml        | 300 mg/ml    | 37.5 mg/ml       | 600 mg/ml   | 30 mg SEQ/ml | 10 mg SEQ/ml | 10 mg SEQ/ml      |                   |
| <b>Antioxidant</b>                                           |            |                  |              |                  |             |              |              |                   |                   |
| Similar to natural killer cell enhancing factor (zgc:110343) | BI980610   | -                | -            | -                | -           | 2.3          | 2.0          | 1.7 <sup>b</sup>  | -                 |
| <b>Hydrolase activity</b>                                    |            |                  |              |                  |             |              |              |                   |                   |
| Amylase, alpha 2A; pancreatic ( <i>amy2a</i> )               | BM103972   | -                | -            | -                | -           | -4.2         | -2.9         | -1.7 <sup>b</sup> | -1.8 <sup>b</sup> |
| Similar to elastase 1 precursor (B8JM76_DANRE)               | BM154197   | -                | -            | -                | -           | -3.2         | -            | -                 | -                 |
| Elastase 2 ( <i>ela2</i> )                                   | BI705588   | -                | -            | -                | -           | -7.9         | -3.7         | -1.7 <sup>b</sup> | -                 |
| Elastase 2 like ( <i>ela2l</i> )                             | AW174168   | 1.8 <sup>b</sup> | -            | -                | -           | -7.6         | -3.6         | -1.9 <sup>b</sup> | -2.2              |
| Elastase 3 like ( <i>ela3l</i> )                             | AI558632   | -                | -            | -                | -           | -4.9         | -3.1         | -1.7 <sup>b</sup> | -1.9 <sup>b</sup> |
| Carboxypeptidase A4 ( <i>cpa4</i> )                          | AI496860   | -                | -            | -                | -           | -2.8         | -2.1         | -                 | -                 |
| Carboxypeptidase A5 ( <i>cpa5</i> )                          | AF376130   | -                | -            | -                | -           | -2.7         | -2.0         | -                 | -                 |
| Cathepsin K ( <i>ctsk</i> )                                  | AI384696   | -                | -            | 2.4              | -           | -            | -            | -                 | -                 |
| Cationic trypsin-3 ( <i>try</i> )                            | AJ297822   | -                | -            | -                | -           | -3.0         | -2.1         | -                 | -                 |
| Similar to chymotrypsinogen 2                                | BM101561   | -                | -            | -                | -           | -3.2         | -            | -                 | -                 |
| Similar to trypsinogen                                       | BM184009   | -                | -            | -                | -           | -3.5         | -2.0         | -                 | -                 |
| <b>Lipid metabolism</b>                                      |            |                  |              |                  |             |              |              |                   |                   |
| Carboxyl ester lipase ( <i>cel.1</i> )                       | AF003943   | -                | -            | -                | -           | -3.6         | -2.0         | -                 | -                 |
| Similar to apolipoprotein D (LOC100148022)                   | BM101644   | -                | -            | -                | -           | -3.0         | -2.1         | -                 | -                 |
| <b>Oxidoreductase activity</b>                               |            |                  |              |                  |             |              |              |                   |                   |
| Cytochrome P450 1A ( <i>cyp1a</i> )                          | AF057713   | 3.0              | 5.1          | 5.2              | -           | 43.3         | 44.0         | 21.2              | -                 |
| CytochromeP4501C1( <i>cyp1c1</i> )                           | BG738243   | 1.9 <sup>c</sup> | 2.0          | 2.7 <sup>a</sup> | -           | 13.6         | 10.5         | 4.7               | -                 |
| Glutathione S-transferase pi                                 | AF285098   | -                | -            | -                | -           | 2.4          | 2.2          | 2.2               | -                 |
| Similar to sulfotransferase                                  | AI959735   | -                | -            | -                | -           | -            | -            | 3.8               | -                 |
| <b>Involved in cytokinesis</b>                               |            |                  |              |                  |             |              |              |                   |                   |
| Protein regulator of cytokinesis 1 (zgc:55664)               | BG304231   | -                | -            | -                | -           | 2.3          | -            | -                 | -                 |
| Suppressor of cytokine signaling 3 ( <i>socs3a</i> )         | BI878700   | 2.5              | 2.6          | 2.1              | -           | -            | -            | -                 | -                 |
| <b>Regulator of innate immunity</b>                          |            |                  |              |                  |             |              |              |                   |                   |
| Dual specificity phosphatase 1 ( <i>dusp1</i> )              | BI888604   | 2.1              | -            | -                | -           | -            | -            | -                 | -                 |
| <b>Structural molecule</b>                                   |            |                  |              |                  |             |              |              |                   |                   |
| Similar to keratin                                           | BE200701   | -                | -            | -                | -           | -2.1         | -            | -                 | -                 |
| Keratin 15 ( <i>krt15</i> )                                  | AI397347   | -                | -            | -                | -           | -3.3         | -3.0         | -2.4              | -                 |
| Type I cytokeratin                                           | AF197880   | -                | -            | -                | -           | -2.0         | -            | -                 | -                 |

| Name or orthologous (ensemble gencode)                                           | GenBank ID | Whole sediment samples |                  |                  |             | Extract samples   |                  |              | Process control   |
|----------------------------------------------------------------------------------|------------|------------------------|------------------|------------------|-------------|-------------------|------------------|--------------|-------------------|
|                                                                                  |            | Lau sediment           | Sig sediment     | Ehi sediment     | Silica dust | Lau extract       | Sig extract      | Ehi extract  |                   |
|                                                                                  |            | 300 mg/ml              | 300 mg/ml        | 37.5 mg/ml       | 600 mg/ml   | 30 mg SEQ/ml      | 10 mg SEQ/ml     | 10 mg SEQ/ml |                   |
| <b>DNA damage response</b>                                                       |            |                        |                  |                  |             |                   |                  |              |                   |
| B-cell translocation gene 2 ( <i>btg2</i> )                                      | AB036784   | 2.8                    | 2.1 <sup>a</sup> | -                | -           | -                 | -                | -            | -                 |
| <b>DNA/mRNA binding</b>                                                          |            |                        |                  |                  |             |                   |                  |              |                   |
| mRNA-decapping enzyme 1A ( <i>dcp1a</i> )                                        | AJ344448   | 2.1                    | -                | -                | -           | -                 | -                | -            | -                 |
| TSC22 domain family protein 3 ( <i>tsc22d3</i> )                                 | AW018476   | 2.2                    | -                | -                | -           | -                 | -                | -            | -                 |
| Distal-less homeobox protein 3b ( <i>dlx3b</i> )                                 | X65060     | 2.2                    | 2.1 <sup>a</sup> | -                | -           | -                 | -                | -            | -                 |
| CCAAT/enhancer binding protein beta ( <i>cebpb</i> )                             | AW019436   | 2.0                    | 2.1              | 2.0              | -           | -                 | -                | -            | -                 |
| Similar to CCCH zinc finger protein (hypothetical protein LOC564559; zgc:162730) | BM184163   | 2.1                    | -                | -                | -           | -                 | -                | -            | C                 |
| Jun dimerization protein 2                                                       | BI326453   | 4.7                    | 4.0              | 4.4 <sup>a</sup> | -           | -                 | -                | -            | -                 |
| Kruppel-like factor 2a ( <i>klf2a</i> )                                          | AF392992   | -                      | 2.0              | 2.0              | -           | -                 | -                | -            | -                 |
| Kruppel-like factor 2b ( <i>klf2b</i> )                                          | AF392995   | -                      | 2.1              | 2.6              | -           | -                 | -                | -            | -                 |
| Similar to nuclear receptor ( <i>nr0b2</i> )                                     | BI892036   | -                      | -                | 2.0              | -           | -                 | -                | -            | -                 |
| Nuclear receptor subfamily 1 group D member 1 ( <i>nr1d1</i> )                   | BM024131   | 2.1                    | -                | 2.2              | -           | -                 | -                | -            | -1.8 <sup>b</sup> |
| Transcription factor ( <i>sp9</i> )                                              | BI979064   | -                      | -                | -                | -           | 2.1               | -                | -            | -                 |
| Similar to Transcription factor CP2-like 4 (si:dkey-22114.7)                     | AI477969   | -                      | -                | -                | -           | 2.4 <sup>a</sup>  | 2.1              | -            | -                 |
| <b>Miscellaneous</b>                                                             |            |                        |                  |                  |             |                   |                  |              |                   |
| Annexin A1b ( <i>anxa1b</i> )                                                    | AI331515   | -4.3                   | -2.6             | -5.3             | -           | -                 | -                | -            | -                 |
| Cation transport regulator-like protein 1 ( <i>chac 1</i> )                      | BI888548   | 2.1                    | -                | -                | -           | -                 | -                | -            | -                 |
| Prostaglandin-endoperoxide synthase 2a ( <i>ptgs2a</i> )                         | AW077995   | 2.7                    | 2.0 <sup>a</sup> | 2.0 <sup>a</sup> | -           | -                 | -                | -            | -                 |
| Protein disulfide isomerase family A, member 2 ( <i>pdia 2</i> )                 | AW154400   | -                      | -                | -                | -           | -2.5              | -                | -            | -                 |
| Interleukin 11 receptor, alpha ( <i>ill1ra</i> )                                 | AW154333   | 2.3                    | -                | -                | -           | -                 | -                | -            | -                 |
| Coenzyme Q-binding protein COQ10 homolog (zgc:73324)                             | BI880133   | 2.2                    | -                | -                | -           | -                 | -                | -            | -                 |
| Secreted class III semaphorin ( <i>sema3d</i> )                                  | AF124485   | 2.2                    | -                | -                | -           | -                 | -                | -            | -                 |
| Similar to estrogen-responsive B box protein (LOC767638, zgc: 153258)            | BI878269   | -                      | -                | -                | -           | 2.4               | 2.1              | -            | -                 |
| Nucleoside phosphorylase ( <i>np</i> )                                           | AW019173   | 2.5                    | -                | 2.5              | -           | -                 | -                | -            | -                 |
| Unknown                                                                          | AA566708   | -                      | -                | -                | -           | -6.9              | -3.0             | -            | -                 |
| Unknown                                                                          | AF112374   | 2.3 <sup>a</sup>       | 2.1              | -                | -           | -                 | -                | -            | -                 |
| Unknown                                                                          | AI353541   | -2.6                   | -2.9             | -3.0             | -           | -                 | -                | -            | -                 |
| Unknown                                                                          | AI353694   | 2.0                    | 2.4              | -                | -           | 2.2               | 1.8 <sup>b</sup> | -            | -                 |
| Unknown                                                                          | AI437134   | 2.0                    | -                | -                | -           | -2.1 <sup>a</sup> | -                | -            | -                 |
| Unknown                                                                          | AL591482   | -                      | -                | -                | -           | 2.4               | -                | -            | -                 |
| Unknown                                                                          | AW455027   | -                      | -                | -2.8             | -           | -                 | -                | -            | -                 |
| Unknown (wu:fk66d05)                                                             | BE016163   | 2.0                    | -                | -                | -           | -                 | -                | -            | -                 |
| Unknown                                                                          | BE557704   | 2.8                    | 2.7              | 3.1              | -           | -                 | -                | -            | -                 |
| Unknown                                                                          | BG737292   | -                      | -                | -                | -           | -2.1              | -2.0             | -            | -                 |
| Unknown                                                                          | BI878214   | -                      | -                | -5.3             | -           | 2.2 <sup>a</sup>  | -                | -            | -                 |
| Unknown                                                                          | BI474700   | -                      | -                | -                | -           | 2.6               | -                | -            | -                 |

| Name or orthologous<br>(ensemble gencode) | GenBank<br>ID | Whole sediment samples          |                                 |                                  |                                | Extract samples                   |                                   |                                   | Process<br>control |
|-------------------------------------------|---------------|---------------------------------|---------------------------------|----------------------------------|--------------------------------|-----------------------------------|-----------------------------------|-----------------------------------|--------------------|
|                                           |               | Lau<br>sediment<br>300<br>mg/ml | Sig<br>sediment<br>300<br>mg/ml | Ehi<br>sediment<br>37.5<br>mg/ml | Silica<br>dust<br>600<br>mg/ml | Lau<br>extract<br>30 mg<br>SEQ/ml | Sig<br>extract<br>10 mg<br>SEQ/ml | Ehi<br>extract<br>10 mg<br>SEQ/ml |                    |
| Unknown (LOC556307;<br>zgc:158605)        | BM095918      | -                               | -                               | 2.0                              | -                              | -                                 | -                                 | -                                 | -                  |
| Unknown                                   | BM101698      | -                               | -                               | -                                | -                              | 2.6                               | -                                 | -                                 | -                  |
| Unknown LOC568780<br>(zgc:158343)         | BM102743      | 2.0                             | -                               | -                                | -                              | -                                 | -                                 | -                                 | -                  |
| Unknown (LOC100148860)                    | BM183152      | 1.8 <sup>b</sup>                | 2.4                             | 3.0                              | -                              | 6.0                               | 5.2                               | 3.5                               | -                  |
| Unknown                                   | BQ618331      | -                               | -                               | -                                | -                              | -                                 | 2.0                               | -                                 | -                  |

<sup>a</sup> added fold changes if fold change is  $\geq 2.0$  and the adjusted p-value  $\leq 0.05$

<sup>b</sup> added fold changes if fold change is  $\leq 2.0$  but  $\geq 1.7$  and the adjusted p-value  $\leq 0.005$

<sup>c</sup> added fold change with a fold change  $\geq 2.0$  and an adjusted p-value of 0.028
